# Supplementary material for: A novel channel selection method for multiple motion classification using high-density electromyography
Source: Springer Nature journal article supplement (doi:10.1186/1475-925x-13-102), 2014-07-25

**(a) MCCSP-Monopolar**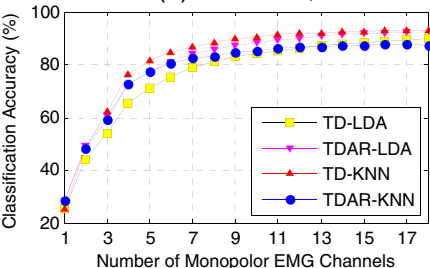**(b) SFS-Monopolar**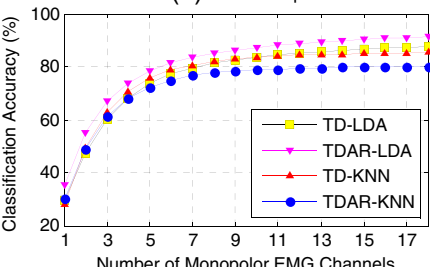**(c) FMS-Monopolar**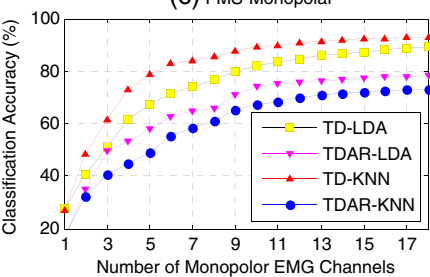**(d) MCCSP-Bipolar**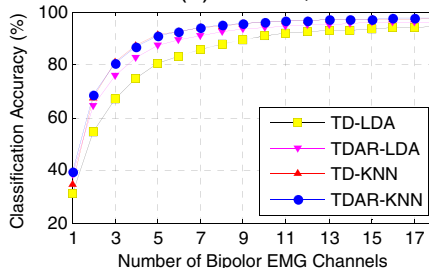**(e) SFS-Bipolar**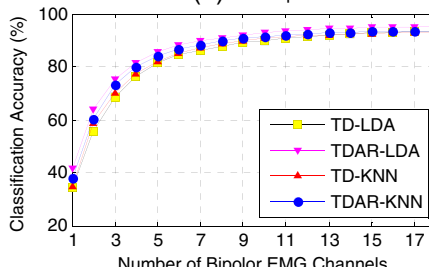**(f) FMS-Bipolar**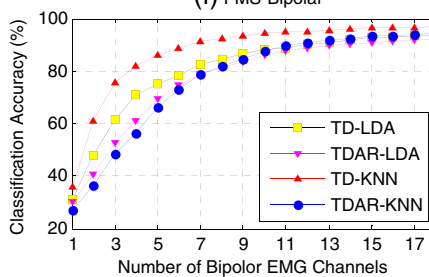

Supplement: 12938_2014_848_MOESM5_ESM.pdf [file 12938_2014_848_MOESM5_ESM.pdf]
